# Supplementary material
Source: Elsevier journal article supplement (https://www.sciencedirect.com/science/article/pii/S1579212921002706)
Supplement: mmc2 [file S1579212921002706:mmc2.pdf]

## SUPPLEMENTARY MATERIAL

### RESULTS

Supplementary Table 1: Previous admissions and the effect of the fe-COPD ICM on new hospital admissions and emergency visits among the patients enrolled in the program after a median follow-up of 31 months

| Variable                 | Mean $\pm$ SD   | Median (IQR) | Percentage of reduction in relation to all expected |
|--------------------------|-----------------|--------------|-----------------------------------------------------|
| New hospital admissions  | 3.93 $\pm$ 4.28 | 3 (1 – 6)    | 38.2%                                               |
| Admissions avoided       | 2.32 $\pm$ 3.00 | 1 (0 – 4)    |                                                     |
| New emergency visits     | 1.46 $\pm$ 2.03 | 1 (0 – 2)    | 69.7%                                               |
| Emergency visits avoided | 4.78 $\pm$ 5.94 | 3 (0 – 6)    |                                                     |

Supplementary Table 2: Multivariate analysis in relation to number of new hospital admission  $\geq$  2 among fe-COPD ICM group

|                                                     | B     | S.E.  | df | Sig.   | Odd ratio | 95% C.I. for odd ratio |       |
|-----------------------------------------------------|-------|-------|----|--------|-----------|------------------------|-------|
|                                                     |       |       |    |        |           | Lower                  | Upper |
| Age                                                 | 0.395 | 0.320 | 1  | 0.216  | 1.49      | 0.79                   | 2.78  |
| Female gender                                       | 1.255 | 0.756 | 1  | 0.097  | 3.51      | 0.79                   | 15.42 |
| <i>Pseudomonas aeruginosa</i> infection             | 1.205 | 0.874 | 1  | 0.168  | 3.34      | 0.60                   | 18.50 |
| Last follow-up CAT score > 17                       | 2.029 | 0.817 | 1  | 0.013* | 7.61      | 1.53                   | 37.72 |
| BODE index                                          | 0.001 | 0.192 | 1  | 0.997  | 1.00      | 0.69                   | 1.46  |
| Previous admissions 1 year before enrollment in ICM | 0.356 | 0.186 | 1  | 0.056  | 1.43      | 0.99                   | 2.06  |
| Constant                                            | 1.366 | 1.866 | 1  | 0.464  | 3.921     |                        |       |

OR: odd ratio, CAT: COPD assessment test, GOLD: Global Initiative for Chronic Obstructive

Lung Disease, BODE: “body mass index, airflow obstruction, dyspnoea, exercise capacity”

index, \*significant  $p$  value < 0.05.

Supplementary Table 3: Univariate analysis in relation to mortality among studied fe-COPD cohort (both control and ICM groups)

|                                                     | OR    | 95% CI for OR |       | Sig.<br>( <i>p</i> value) |
|-----------------------------------------------------|-------|---------------|-------|---------------------------|
|                                                     |       | Lower         | Upper |                           |
| Age                                                 | 1.162 | 0.951         | 1.421 | 0.142                     |
| Female gender                                       | 3.002 | 1.704         | 5.312 | <0.0001*                  |
| mMRC dyspnea scale                                  | 1.803 | 1.302         | 2.497 | <0.0001*                  |
| FEV <sub>1</sub> (L)                                | 1.725 | 1.294         | 2.300 | <0.0001*                  |
| FEV <sub>1</sub> (% predicted)- GOLD classification | 1.026 | 0.967         | 1.089 | 0.394                     |
| FVC (L)                                             | 1.219 | 0.958         | 1.550 | 0.107                     |
| FVC (% predicted)                                   | 1.390 | 1.086         | 1.780 | 0.009*                    |
| FEV <sub>1</sub> / FVC                              | 1.235 | 1.019         | 1.496 | 0.032*                    |
| Pseudomonas Aeruginosa infection                    | 2.126 | 1.262         | 3.581 | 0.005*                    |
| All bacterial infections                            | 1.607 | 0.989         | 2.610 | 0.055                     |
| BMI                                                 | 1.446 | 1.121         | 1.865 | 0.005*                    |
| ADO index                                           | 1.601 | 1.294         | 1.982 | < 0.0001*                 |
| Oxygen therapy                                      | 1.749 | 1.060         | 2.884 | 0.029*                    |

OR: odd ratio, mMRC: modified medical research council, FEV<sub>1</sub>: forced expiratory volume in 1 second, FVC: forced vital capacity, L: liter, GOLD: Global Initiative for Chronic Obstructive Lung Disease, \*significant *p* value < 0.05.

Supplementary Table 4: Univariate analysis in relation to mortality among fe-COPD included in ICM program

|                                                     | OR    | 95% CI for OR |       | Sig.<br>( <i>p</i> value) |
|-----------------------------------------------------|-------|---------------|-------|---------------------------|
|                                                     |       | Lower         | Upper |                           |
| Age                                                 | 1.090 | 0.802         | 1.482 | 0.581                     |
| Female gender                                       | 2.691 | 1.246         | 5.809 | 0.012*                    |
| FEV <sub>1</sub> (L)                                | 2.007 | 1.321         | 3.048 | <0.0001*                  |
| FEV <sub>1</sub> (% predicted)- GOLD classification | 1.017 | 0.932         | 1.111 | 0.701                     |
| FVC (L)                                             | 1.232 | 0.900         | 1.685 | 0.192                     |
| FVC (% predicted)                                   | 1.573 | 1.086         | 2.279 | 0.017*                    |
| FEV <sub>1</sub> / FVC                              | 1.438 | 1.050         | 1.969 | 0.024*                    |
| Pseudomonas Aeruginosa infection                    | 2.053 | 1.012         | 4.163 | 0.046*                    |
| All bacterial infections                            | 1.421 | 0.710         | 2.843 | 0.321                     |
| Basal mMRC dyspnea scale                            | 2.008 | 1.244         | 3.241 | 0.004*                    |
| Basal CAT score                                     | 1.219 | 0.956         | 1.555 | 0.110                     |
| CAT score (after 1 year)                            | 1.405 | 1.050         | 1.880 | 0.022*                    |
| BODE index                                          | 1.808 | 1.250         | 2.616 | 0.002*                    |
| Last follow-up CAT score                            | 1.841 | 1.326         | 2.554 | <0.0001*                  |
| Last follow-up CAT score > 17                       | 4.138 | 1.973         | 8.679 | <0.0001*                  |

OR: odd ratio, mMRC: modified medical research council, FEV<sub>1</sub>: forced expiratory volume in 1 second, FVC: forced vital capacity, L: liter, CAT: COPD assessment test, GOLD: Global

Initiative for Chronic Obstructive Lung Disease, BODE: “body mass index, airflow obstruction, dyspnoea, exercise capacity” index, \*significant  $p$  value < 0.05.

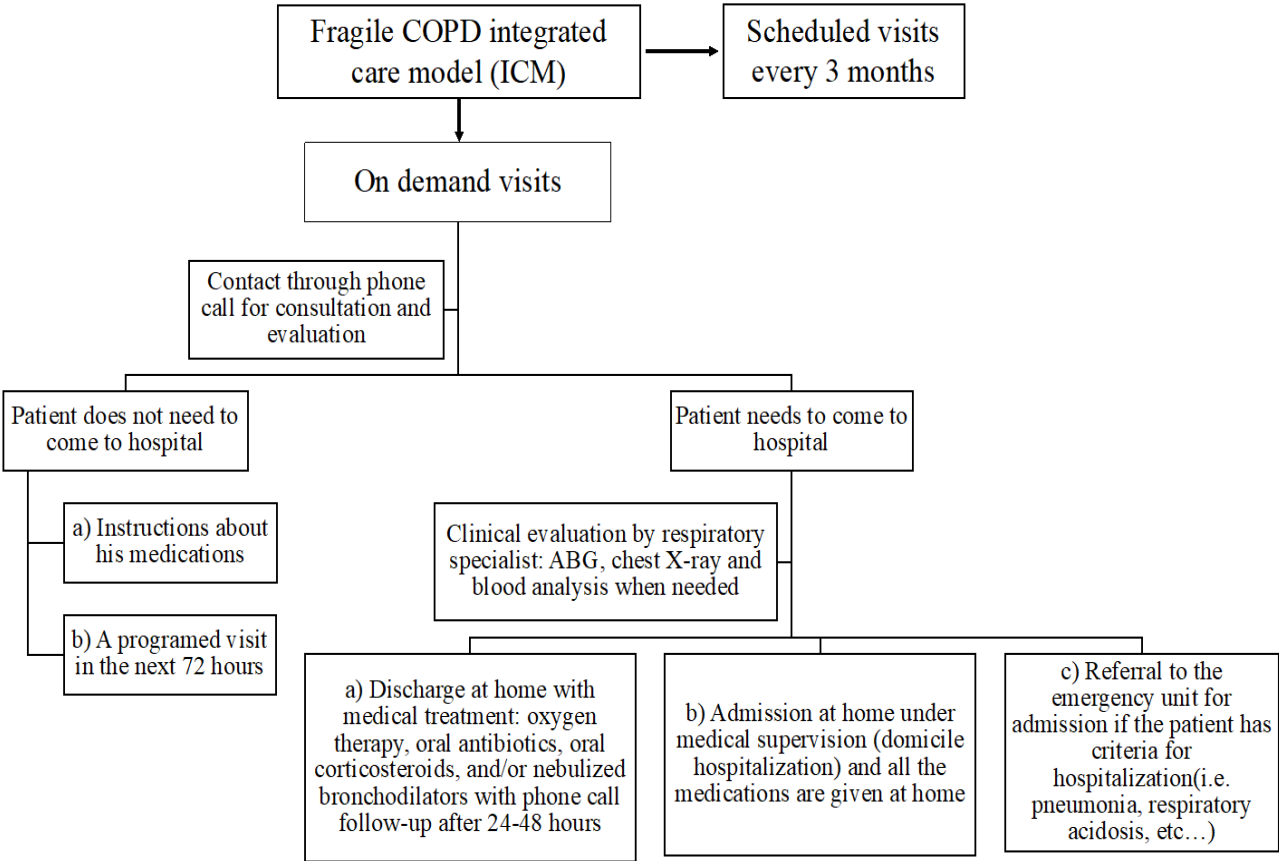

Supplementary Figure 1: The outline of the fe-COPD program

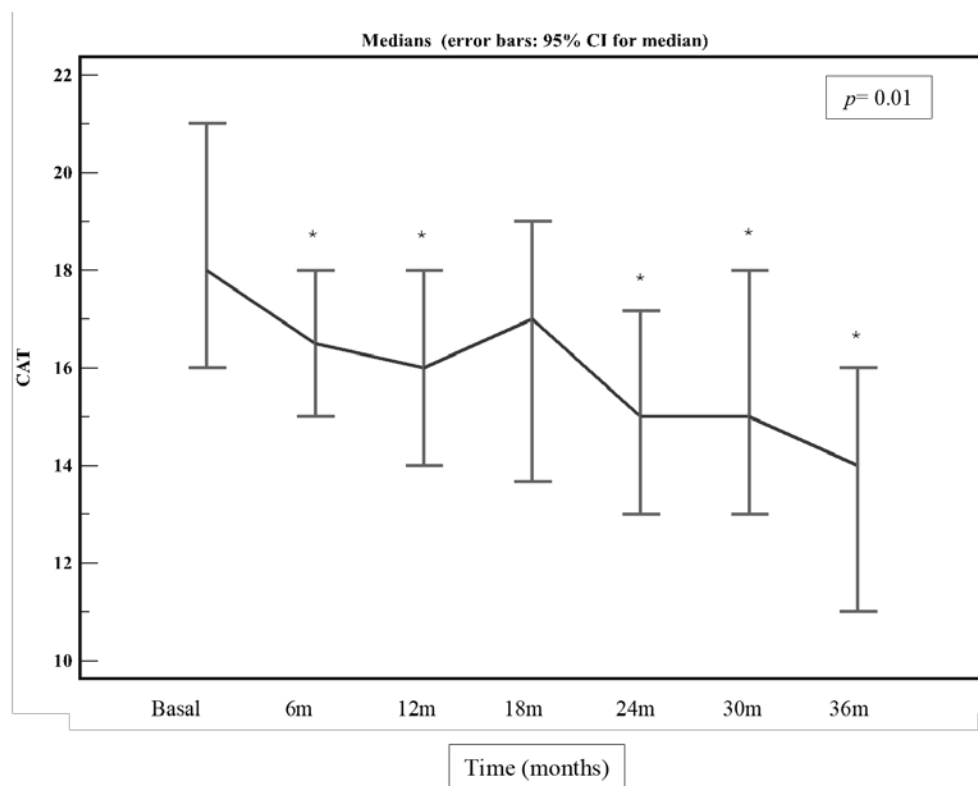

Supplementary Figure 2: Changes of CAT score over follow-up period of 36 months (m: month,

\* significant  $p$  value  $< 0.05$  compared to basal CAT score value)

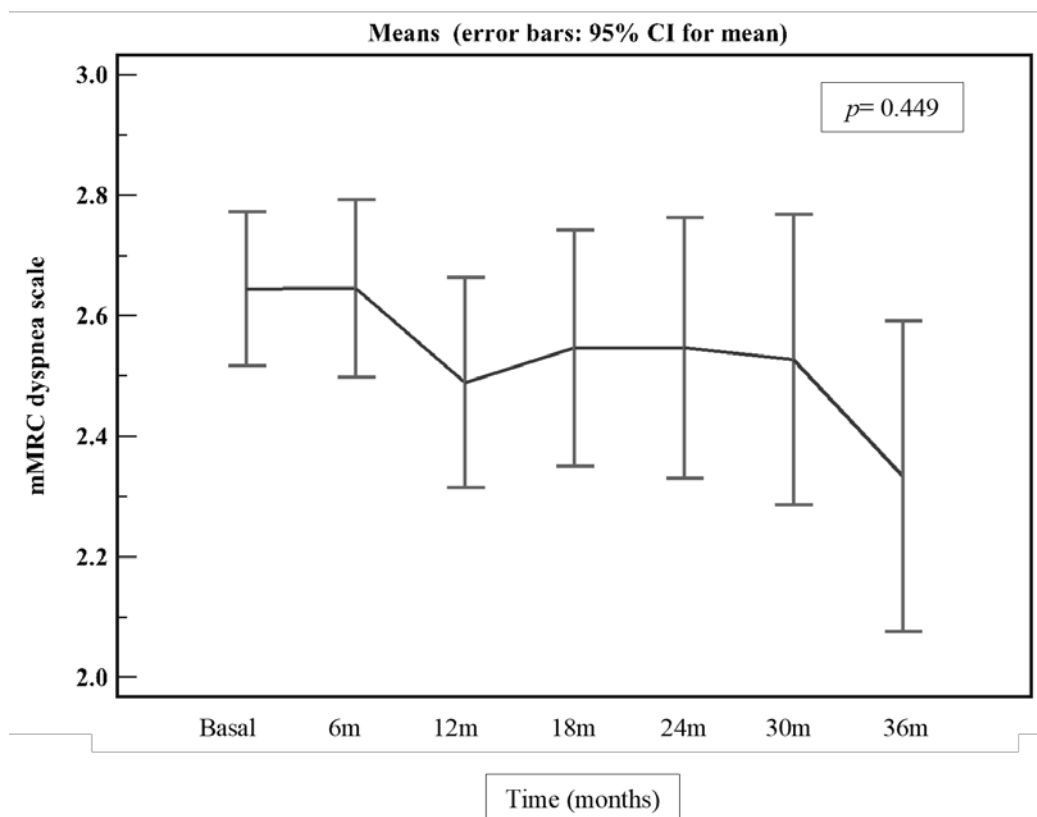

Supplementary Figure 3: Changes of mMRC dyspnea scale over follow-up period of 36 months. (m: month)

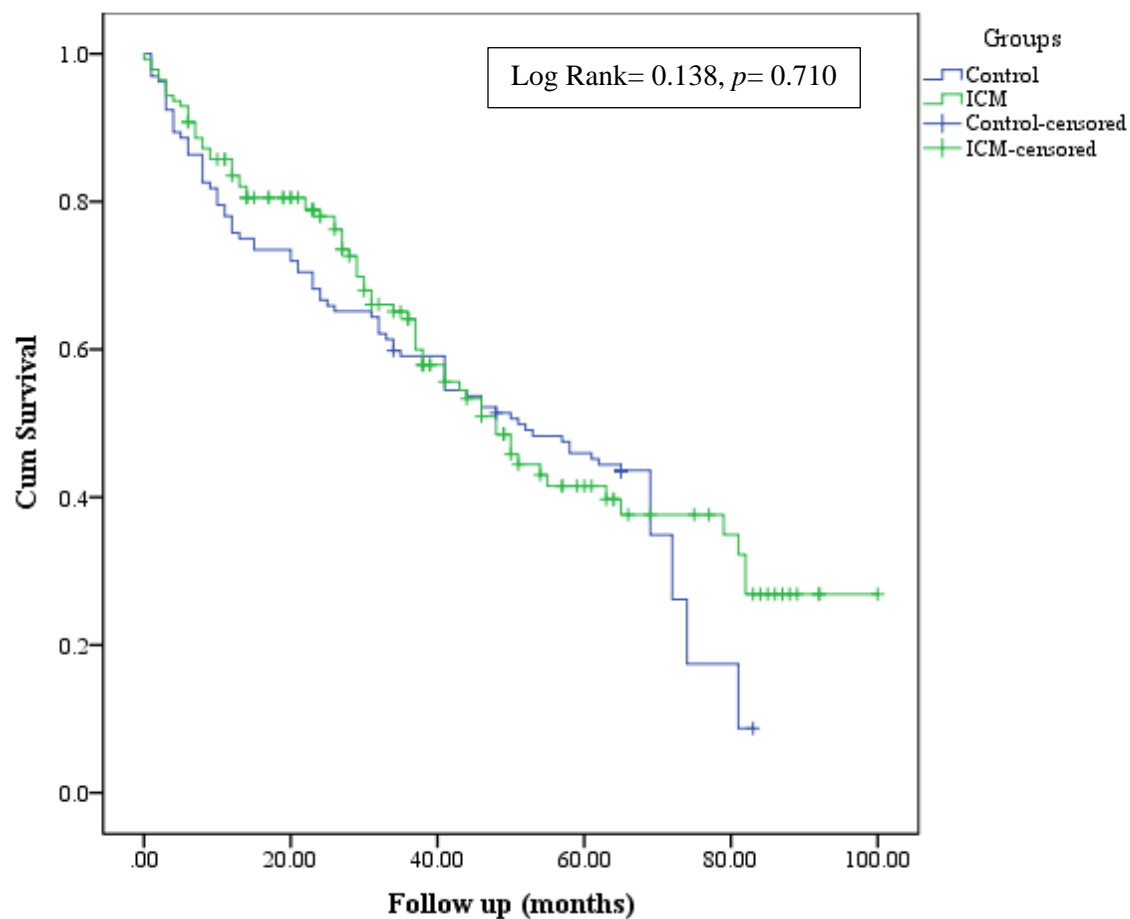

Supplementary Figure 4: Kaplan-Meier survival analysis of entire studied population in relation to mortality.
